# Supplementary material for: Modes of Atmospheric Energetics Based on HadGEM3-GC3.1-LL Simulations in the Framework of CMIP6
Source: Hindawi journal article supplement (doi:10.1155/2023/3956086), 2023-09-02
Supplement: f1 [file 3956086.f1.docx]

Energy cycle components for historical data.

| 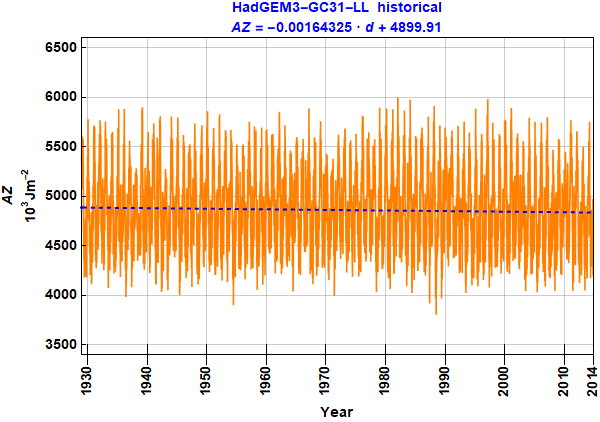 | 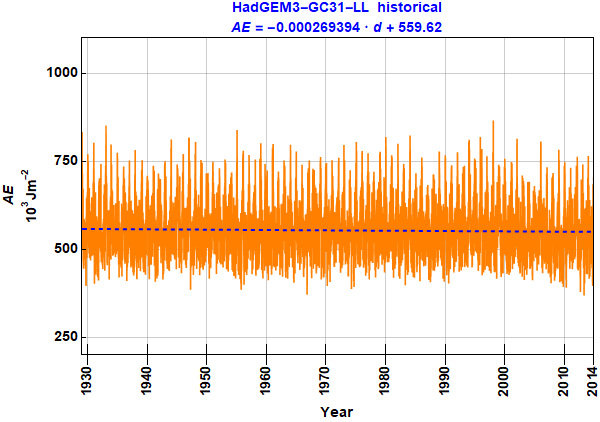 |
| --- | --- |
| 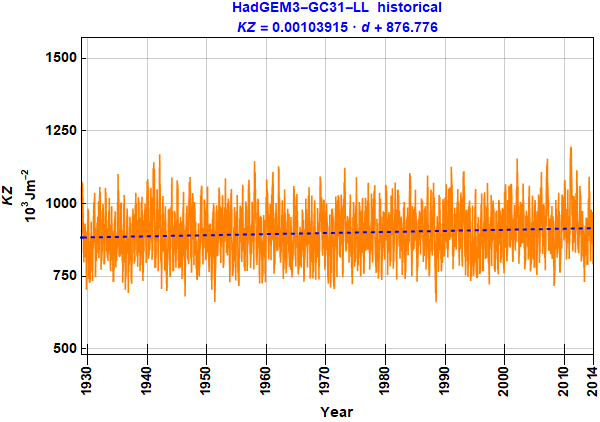 | 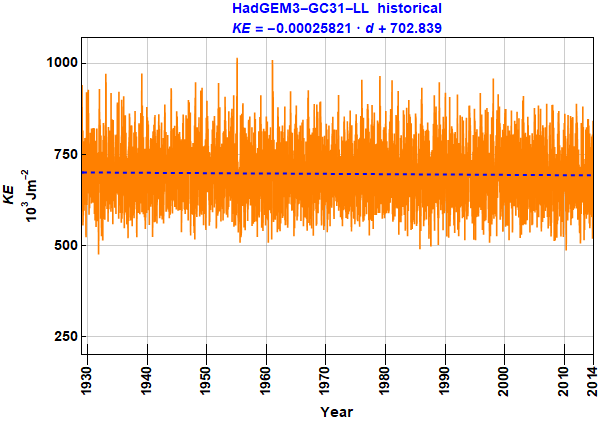 |
| **Figure s1.** Time series for energy forms for the historical data (1929-2014). The dashed line is the fitted linear regression which is given at the top of each diagram as a function of day (*d*). | |

| 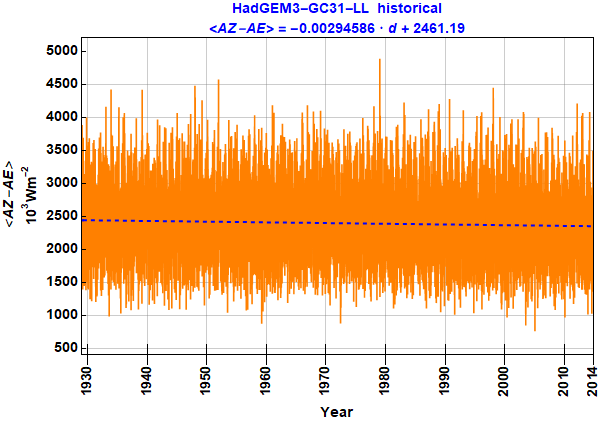 | 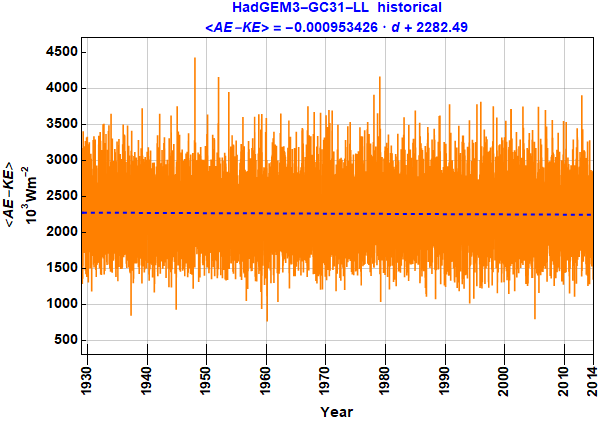 |
| --- | --- |
| 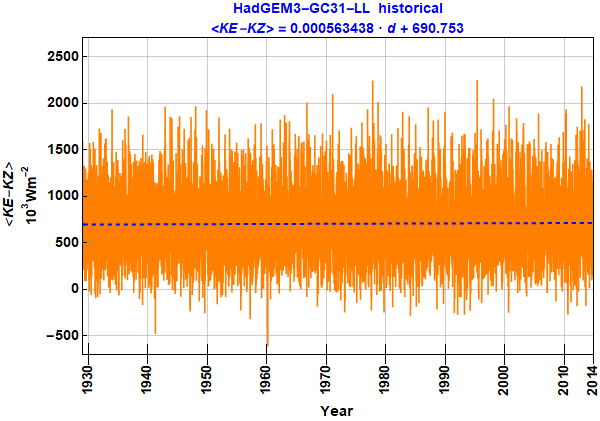 | 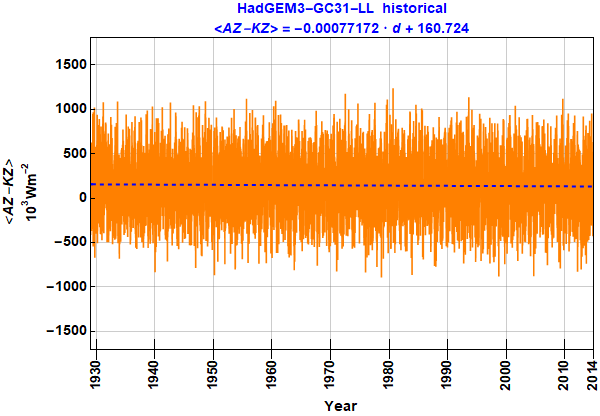 |
| **Figure s2.** Time series for energy conversions for the historical data (1929-2014). The dashed line is the fitted linear regression which is given at the top of each diagram as a function of day (*d*). | |

| 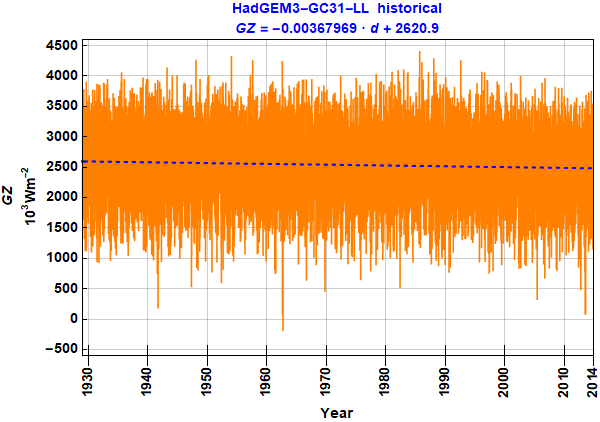 | 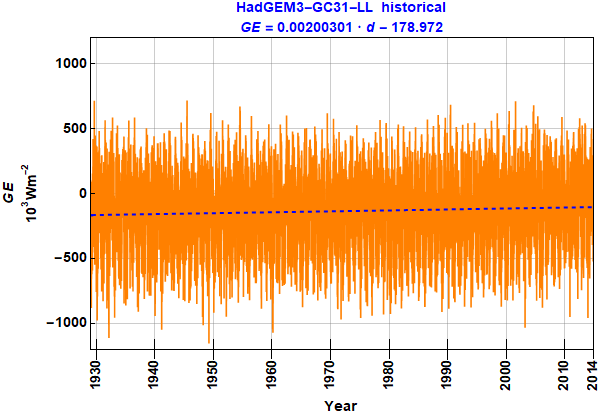 |
| --- | --- |
| 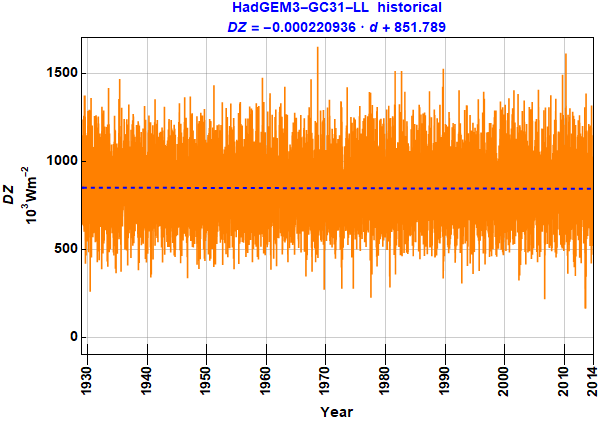 | 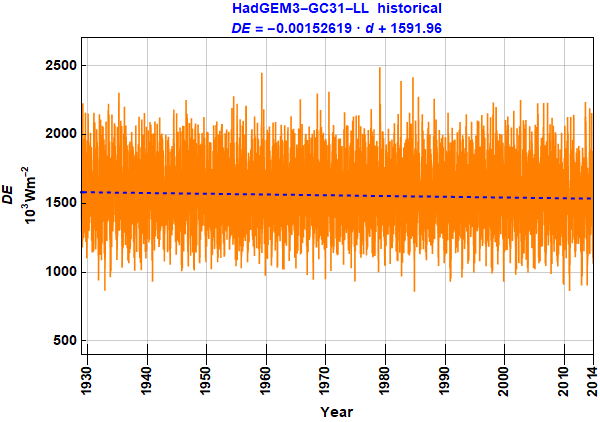 |
| **Figure s3.** Energy generation and dissipation for the historical data (1929-2014). The dashed line is the fitted linear regression which is given at the top of each diagram as a function of day (*d*). | |
